# Supplementary material for: Comprehensive landscape and future perspectives of circular RNAs in colorectal cancer
Source: PubMed Central journal article supplement (PMC7856739; doi:10.1186/s12943-021-01318-6), 2021-02-03

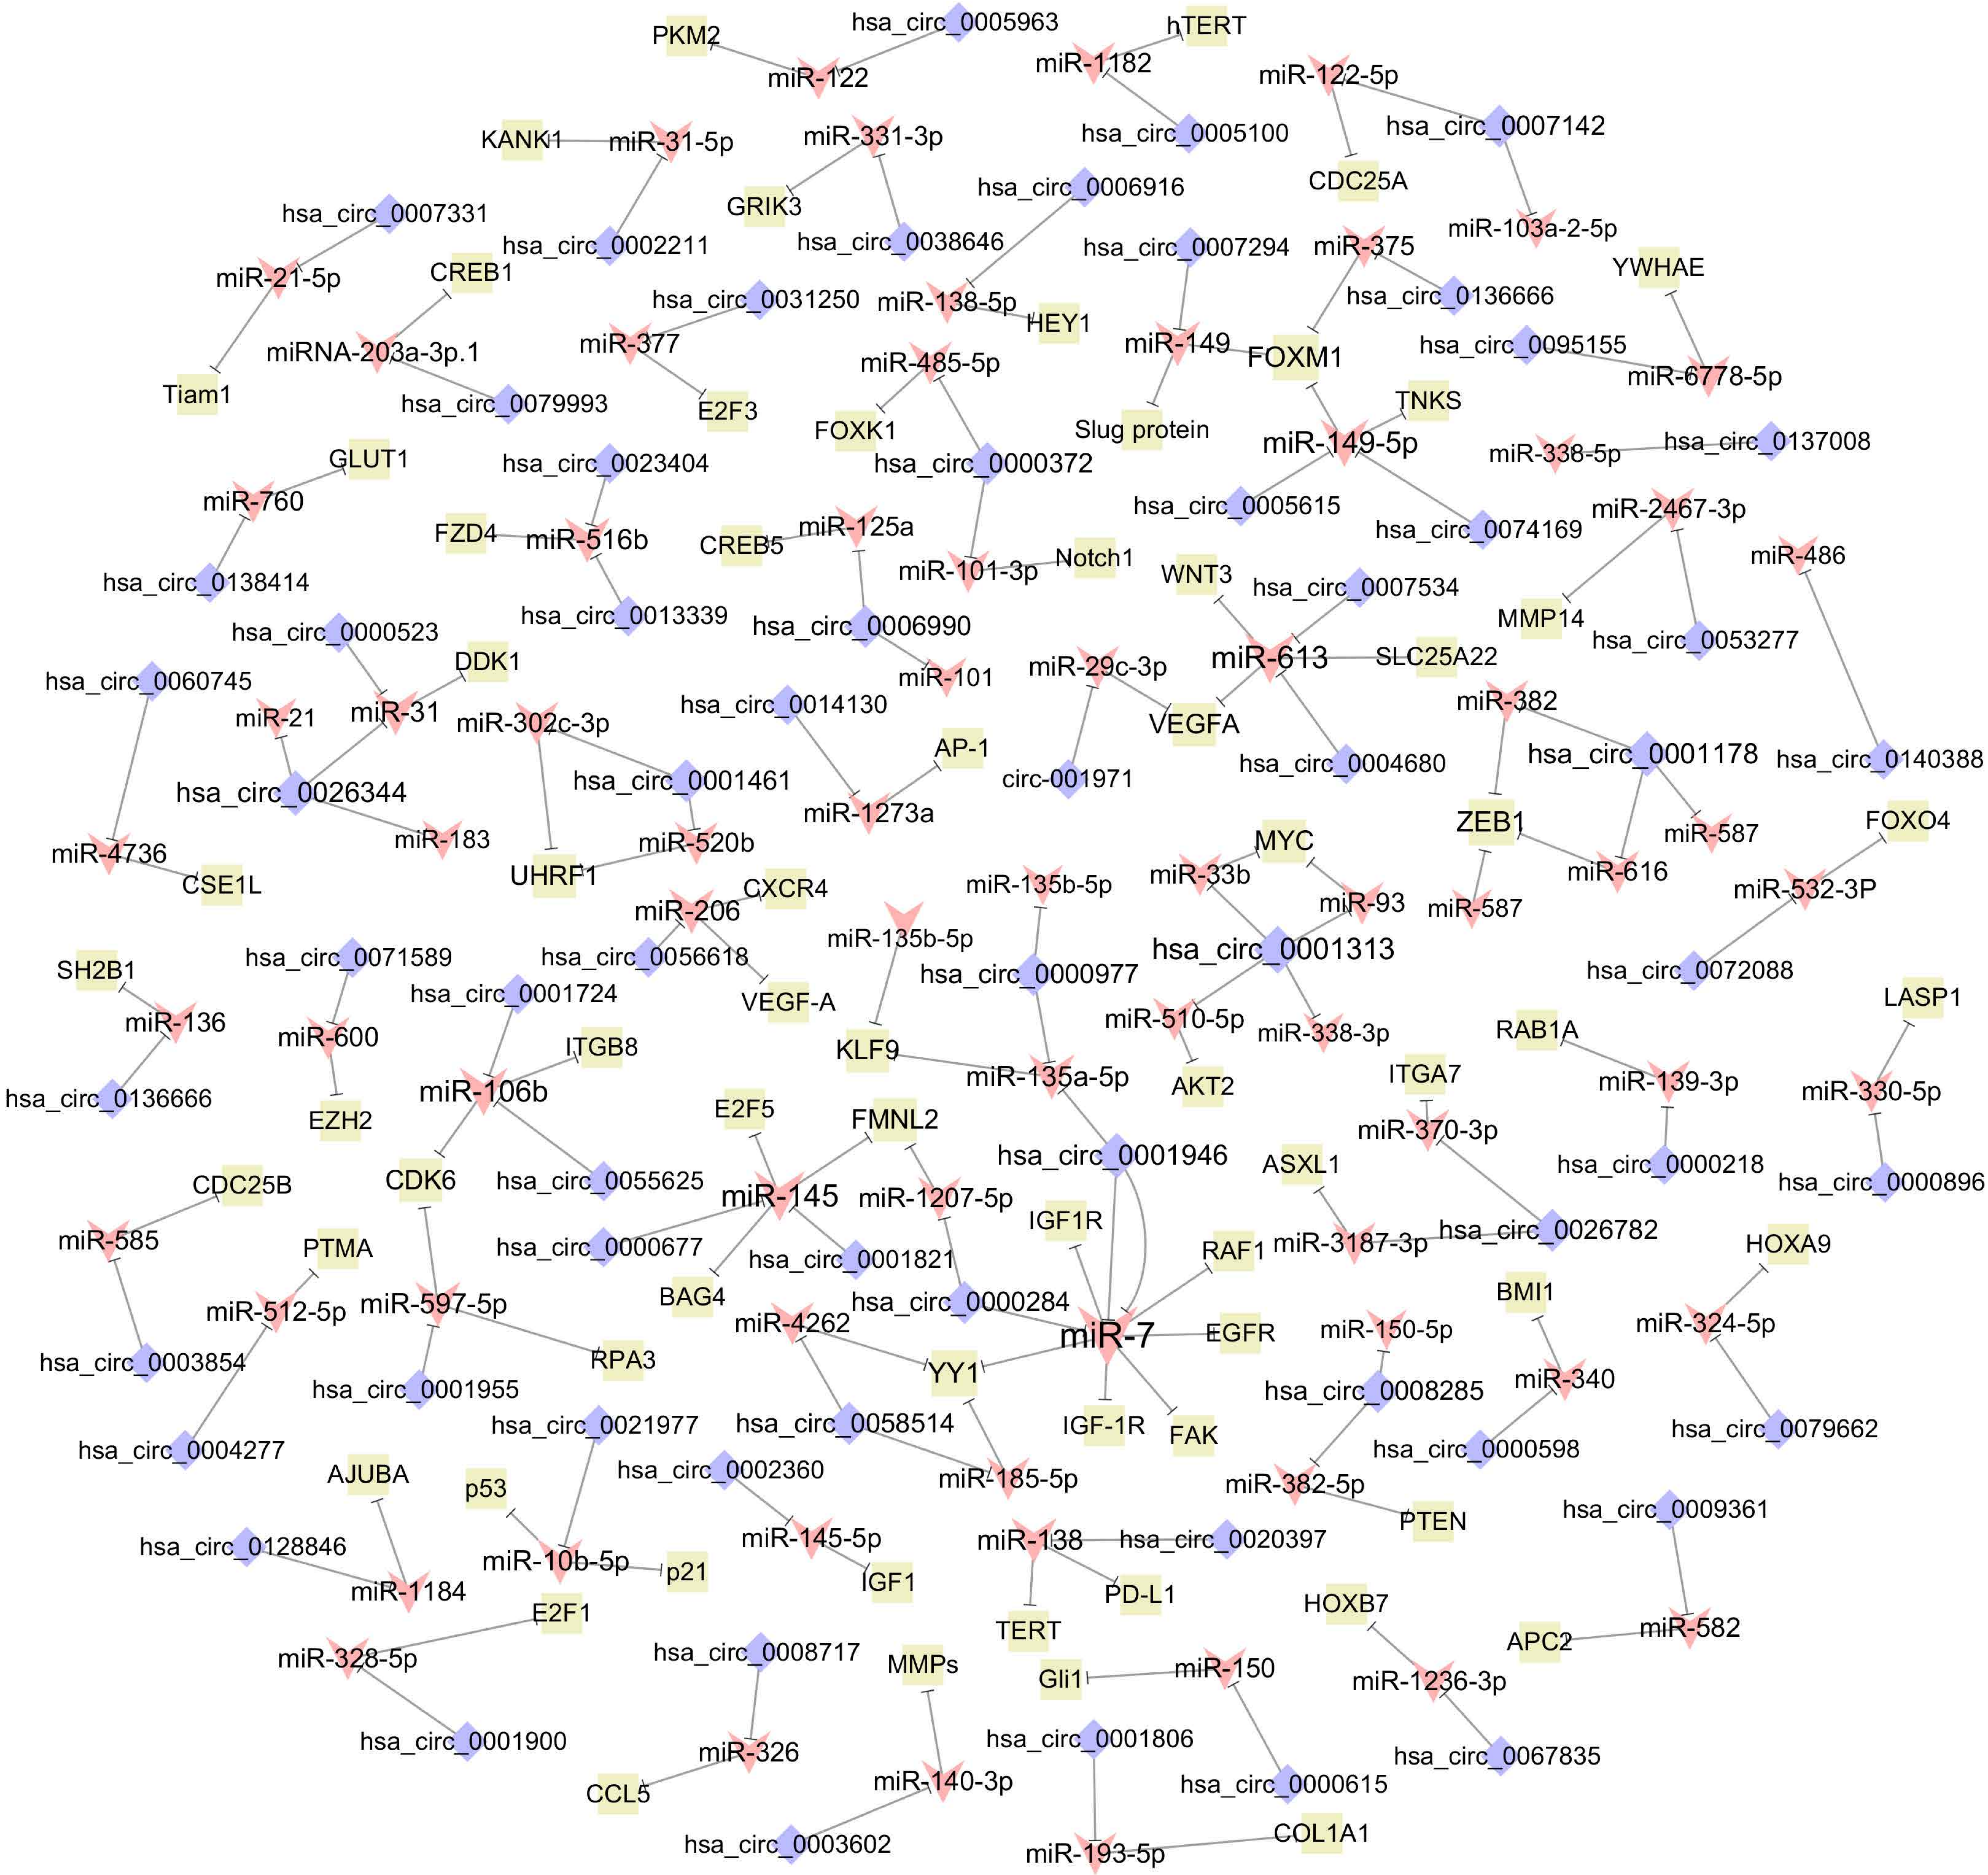

Supplement: 12943_2021_1318_MOESM4_ESM.pdf [file 12943_2021_1318_MOESM4_ESM.pdf]
